# Supplementary material for: Combustion deposition of MoO3films: from fundamentals to OPV applications
Source: Royal Society of Chemistry journal article supplement (doi:10.1039/c5ra18001e), 2015-01-01

## Supporting Information

# Combustion deposition of MoO<sub>3</sub> films: from fundamentals to OPV applications

*Wouter Marchal<sup>1</sup>, Christopher De Dobbelaere<sup>1</sup>, Jurgen Kesters<sup>2</sup>, Gilles Bonneux<sup>1</sup>, Joke Vandenberg<sup>2</sup>, Hanne Damm<sup>1</sup>, Tanja Junkers<sup>2,3</sup>, Wouter Maes<sup>2,3</sup>, Jan D'Haen<sup>3,4</sup>, Marlies K. Van Bael<sup>1,3</sup>, An Hardy<sup>1,3</sup>*

1. Hasselt University, Institute for Materials Research, Inorganic and Physical chemistry,  
Martelarenlaan 42, 3500 Hasselt, Belgium

2. Hasselt University, Institute for Materials Research, Organic and Bio-polymer chemistry,  
Martelarenlaan 42, 3500 Hasselt, Belgium

3. IMEC vzw, division IMOMECE, Agoralaan Building D, 3590 Diepenbeek, Belgium

4. Hasselt University, Institute for Materials Research, Materials Physics, Martelarenlaan 42,  
3500 Hasselt, Belgium

This Supporting information section includes 15 sections, labeled from S1 to S15, including both figures and tables.

**Figure S1.** Cross section SEM image of MoO<sub>x</sub> film deposited on a Si/SiO<sub>2</sub> native oxide substrate processed with the same spin coat parameters as the studied films in TG-MS. The films were subjected to a temperature of 200°C in ambient atmosphere.

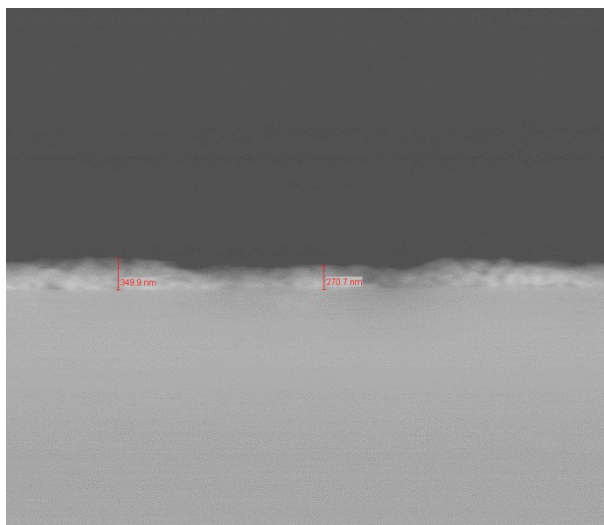

**Figure S2.** ESI-MS assignment of molybdenum-containing species with a single Mo-nucleus.

| Signal 176.91    |               |                 |              |
|------------------|---------------|-----------------|--------------|
| Mo nucleus       | calculated MW | experimental MW | Mo abundance |
| <sup>92</sup> Mo | 170.9098      | 170.9099        | 14.77%       |
| <sup>94</sup> Mo | 172.9081      | 172.9083        | 9.23%        |
| <sup>95</sup> Mo | 173.9088      | 173.9094        | 15.91%       |
| <sup>96</sup> Mo | 174.9076      | 174.9079        | 16.68%       |
| <sup>97</sup> Mo | 175.9090      | 175.9089        | 9.56%        |
| <sup>98</sup> Mo | 176.9084      | 176.9069        | 24.19%       |
| Signal 244.94    |               |                 |              |
| <sup>92</sup> Mo | 238.9437      | 238.9358        | 14.77%       |
| <sup>94</sup> Mo | 240.9420      | 240.9343        | 9.23%        |
| <sup>95</sup> Mo | 241.9427      | 241.9158        | 15.91%       |
| <sup>96</sup> Mo | 242.9415      | 242.9336        | 16.68%       |
| <sup>97</sup> Mo | 243.9429      | 243.9405        | 9.56%        |
| <sup>98</sup> Mo | 244.9423      | 244.9348        | 24.19%       |

ESI assignment of the molybdenum-containing species with two Mo-nuclei. Because of the large amount of possible combinations of Mo-isotopes (resulting in a complicated ESI-MS pattern), only the mass of the species containing two <sup>98</sup>Mo nuclei is calculated below.

| theoretical m/z | experimental m/z |
|-----------------|------------------|
| 322.7985        | 322.8048         |
| 369.7778        | 369.8443         |

**Figure S3.** TGA and DTA of dried molybdenum precursor powders [ox/fuel] = 1, heating rate: 10 °C/min, powder fraction > 1 mm, in dry air and N<sub>2</sub> atmosphere, sample mass air = 3.179 mg, sample mass N<sub>2</sub> = 3.5680 mg.

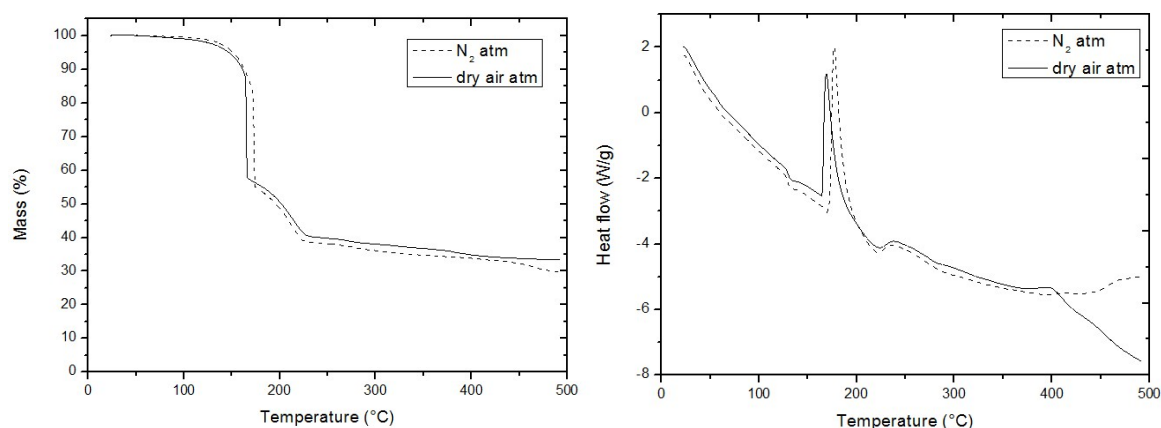

**Figure S4.** TGA of dried Molybdenum precursor powders [ox/fuel] = 1, heating rate 10 °C/min, powder fraction < 63 μm, in dry air as a function of pre-TGA drying temperature. Results indicate increased residual mass at higher drying temperatures.

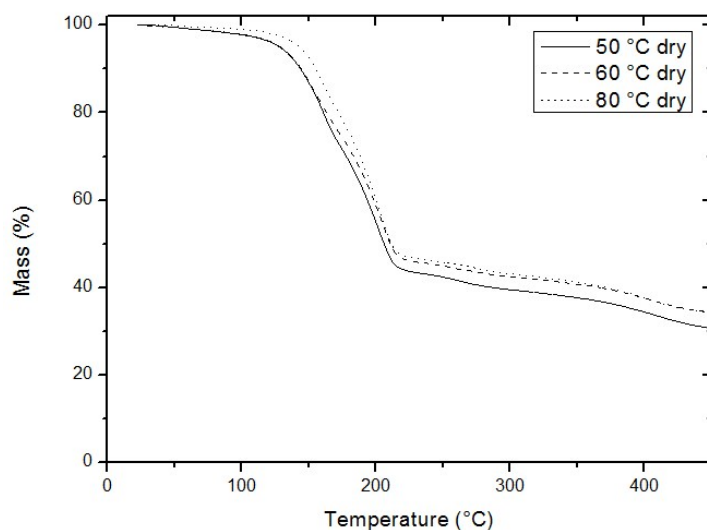

**Figure S5.** Corresponding FTIR spectra of precursor powders dried at temperatures in the range between 50 °C and 80 °C (mixture of MoO<sub>2</sub>(acac)<sub>2</sub> and NH<sub>4</sub>NO<sub>3</sub> from methanol precursor solution) on the left hand side, showing no decomposition of the organic components or influence of hydrolysis. Absorption in > 3000 cm<sup>-1</sup> region is attributed to the NH<sub>4</sub>NO<sub>3</sub> (FTIR spectrum at right hand side).

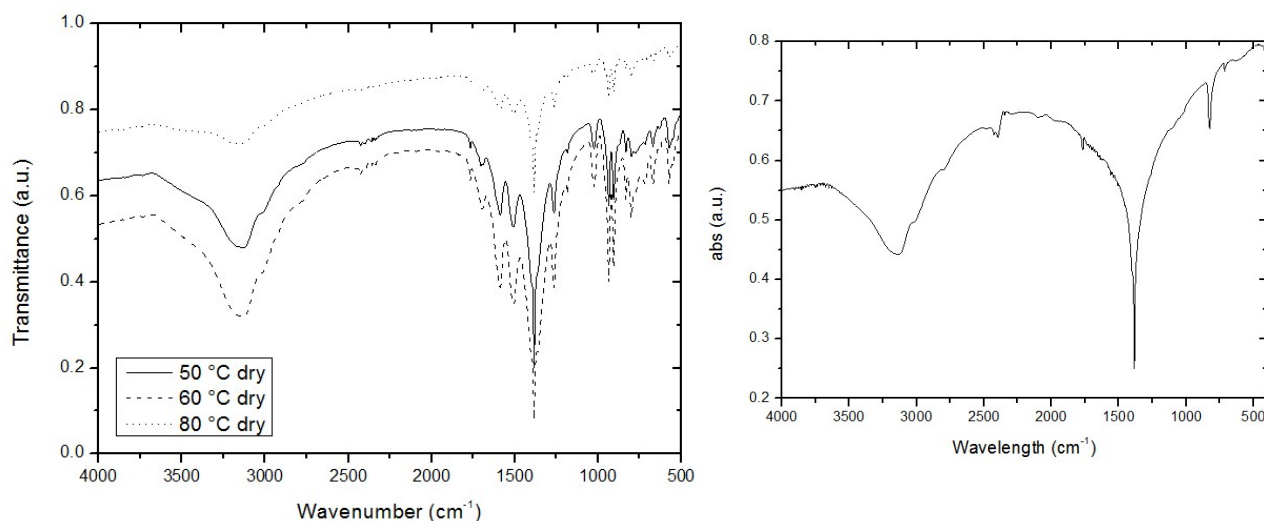

**Figure S6.** TG-FTIR images of the evolved components above 250 °C, [ox/fuel] = 1, heating rate: 10 °C/min. Spectra below indicate NH<sub>3</sub> and H<sub>2</sub>O evolution at 285 °C, and CO<sub>2</sub> and H<sub>2</sub>O evolution at 385 °C. The signals indicate a more significant CO<sub>2</sub> evolution for the 63 μm size fraction which can be related to the TGA results above.

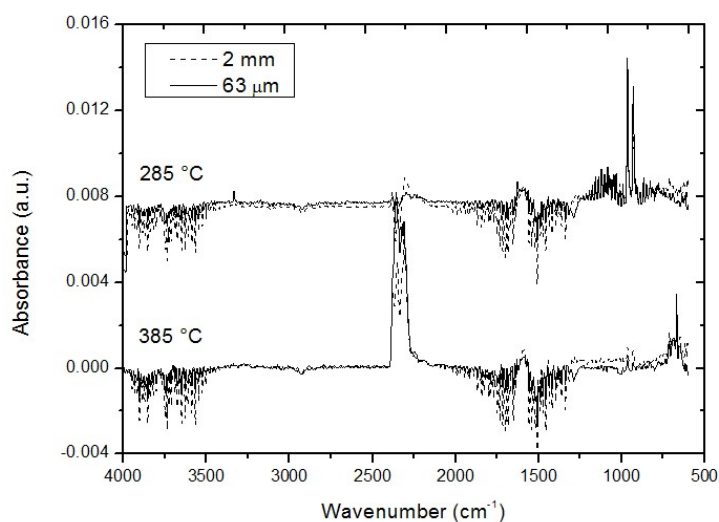

**Figure S7.** Cross section SEM images of MoO<sub>3</sub> layers. The shown images are recorded after deposition of respectively 4 and 8 layers by spin coating. From these results, the approximate thickness per layer can be calculated.

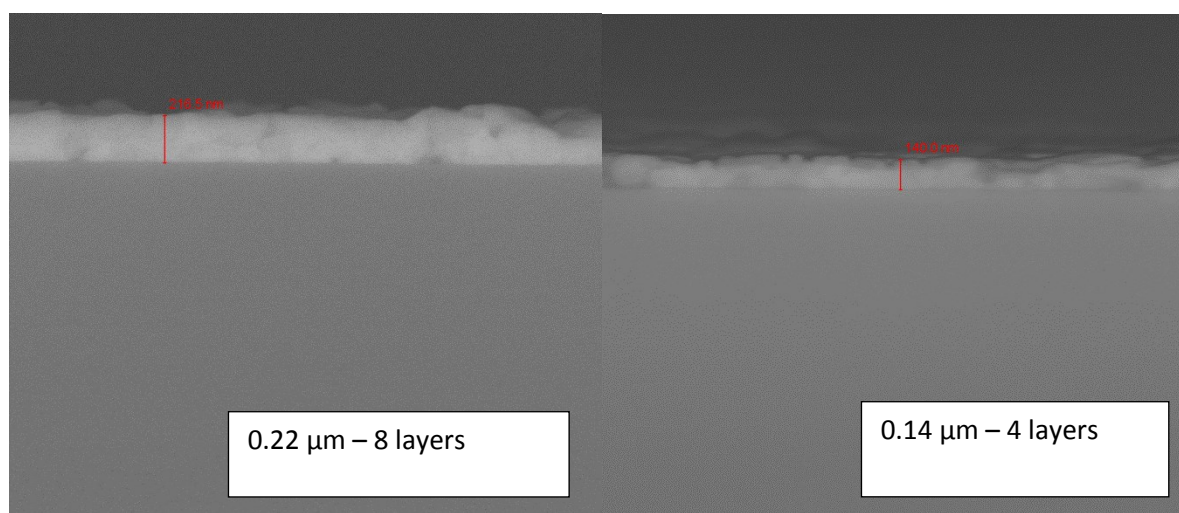

**Figure S8.** Reproducibility of TGA measurements, [ox/fuel] = 1, heating rate 10 °C/min, dry air atmosphere, pre-TGA drying at 80 °C

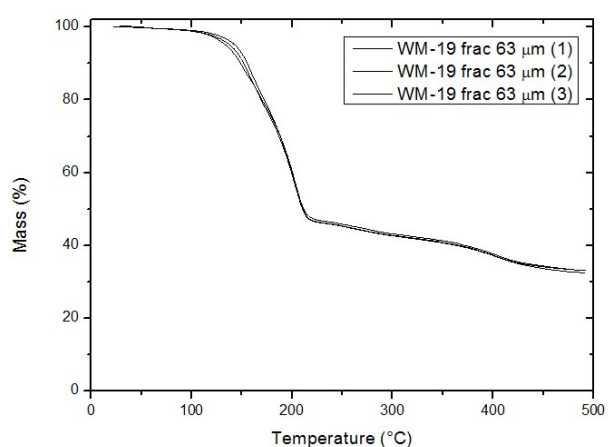

**Figure S9.** TGA (and DTA) results showing the removal of residual organics above 400 °C, indicating a more efficient removal of organics in case of a pronounced combustion reaction (decreased mass loss after 400 °C for 2 mm fraction). Dry air, 10 °C/min, drying at 60 °C, alumina sample pan.

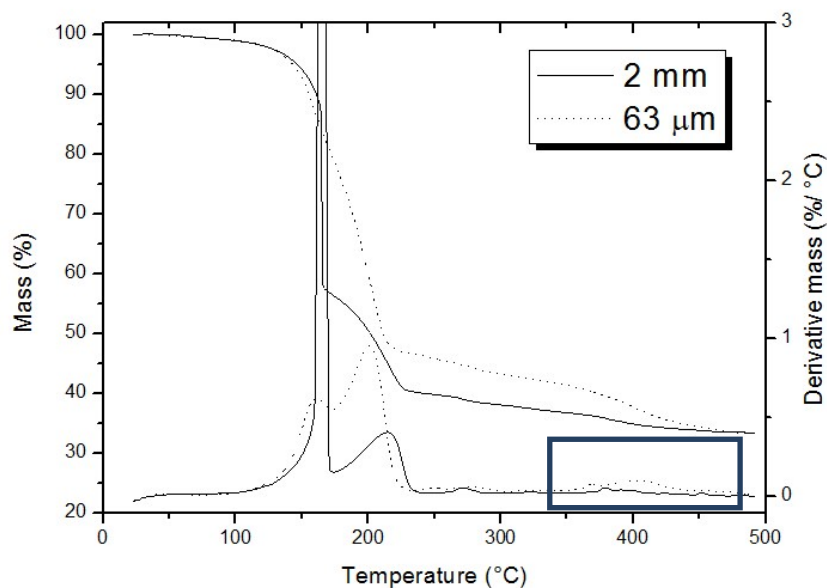

**Figure S10.** Overview of EGA from TG-FTIR of  $[\text{ox}/\text{fuel}] = 0.5$ . The 2 mm fraction single mass loss step corresponds to the right side spectrum (see Gram-Schmidt). The 63  $\mu\text{m}$  fraction shows a more gradual mass loss and thereby an broad Gram-Schmidt signal. Therefore the FTIR spectrum is shown at two different temperatures to present a complete representation of the evolved components during the main mass loss step.

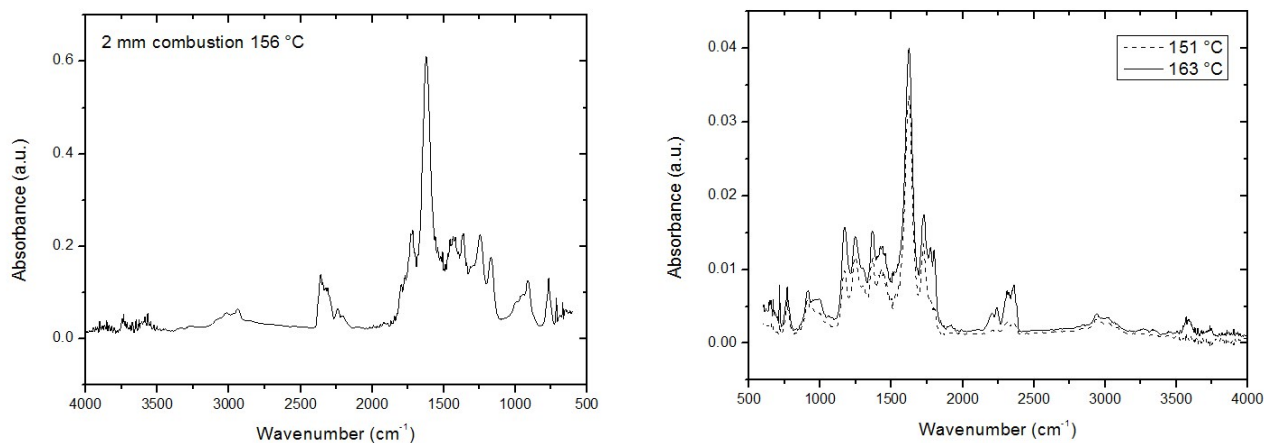

Again, the small size fraction shows an increased  $\text{CO}_2$  signal which is conform aforementioned data of the  $[\text{ox}/\text{fuel}] = 1$  precursor.

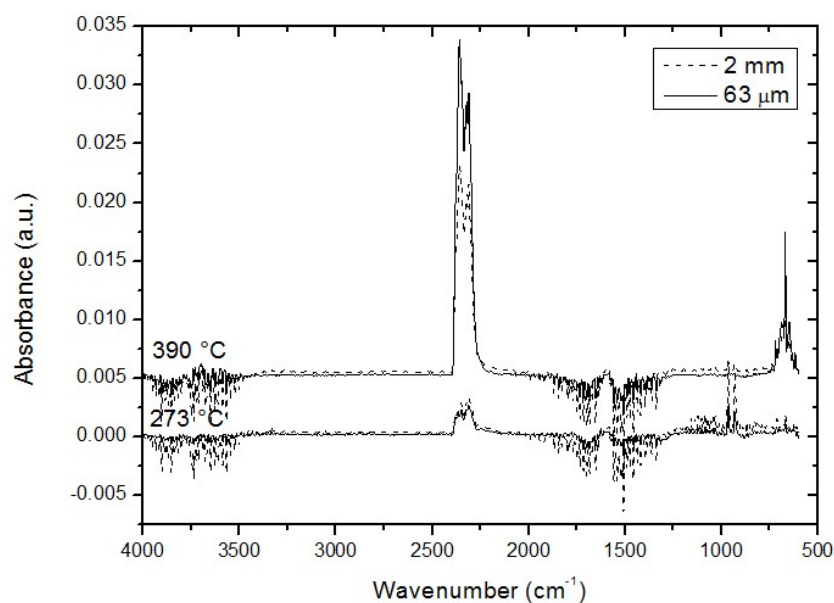

**Figure S11.** XRD diffractograms of  $\text{MoO}_x$  layers on ITO with different temperature treatment focusing on various heating rates ( $10^\circ\text{C}/\text{min}$  versus temperature jump  $80 - 225^\circ\text{C}$ ), and final annealing temperature of  $225^\circ\text{C}$  for both samples. The most intensive signals indicating a crystalline  $\text{MoO}_x$  phase are located at  $19.348^\circ$ ,  $25.689^\circ$  and  $29.287^\circ$ . These signals are clearly present in case of a temperature jump, whereas they are absent for the more gradually heated layer.

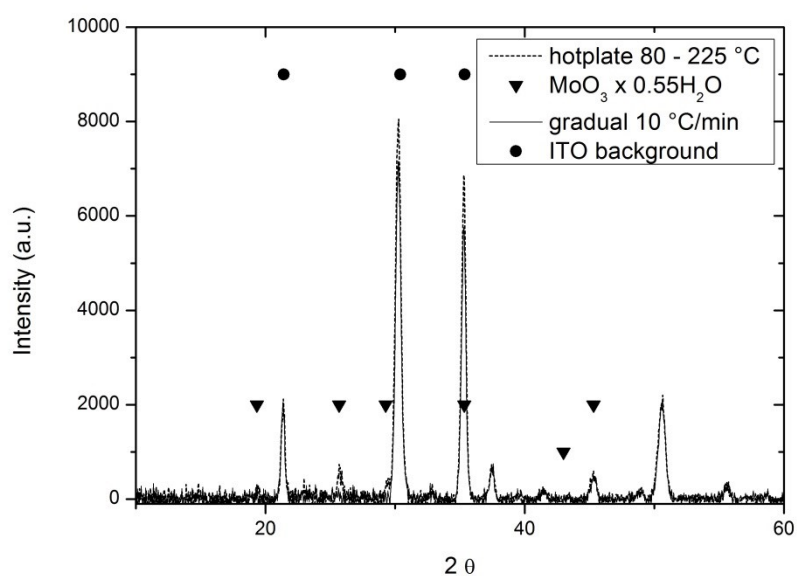

**Figure S12:** GATR-FTIR spectrum of MoO<sub>3</sub> layer after post-calcination in dry air on ITO substrate.

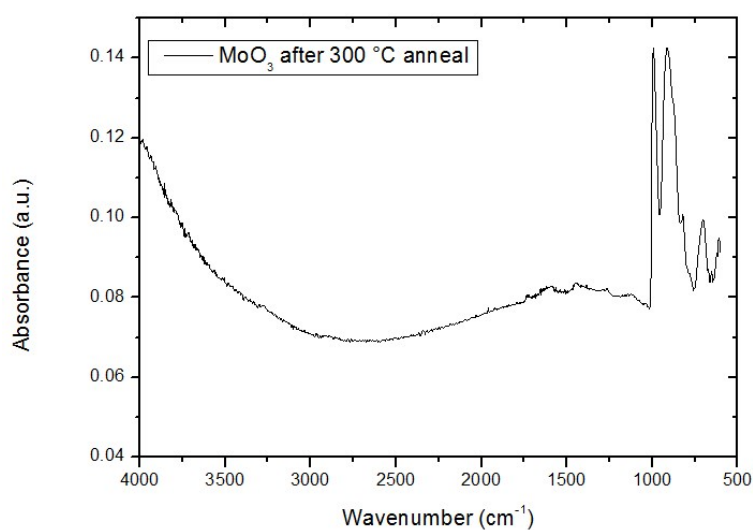

**Figure S13.** Detailed top down SEM image of the MoO<sub>3</sub> layer deposited from the 0.05 M precursor.

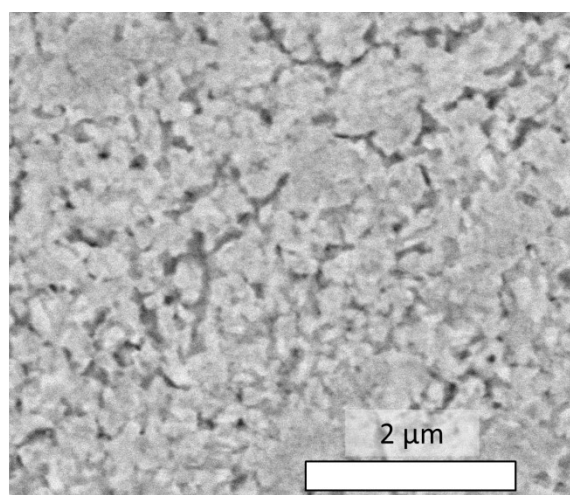

**Figure S14.** Tauc plots of a MoO<sub>3</sub> layer on ITO/borosilicate glass, background corrected, obtained after 4 subsequent layer depositions from the 0.1 M molybdenum precursor. The UV-vis spectrum is measured using the Cary 5000 spectrometer as described in the experimental section. Band gap fits were made for both the direct and indirect band gap. Both  $(\alpha \cdot h\nu)^{1/2}$  and  $(\alpha \cdot h\nu)^2$  are plotted on the ordinate to give an estimate of both the indirect and direct band gap respectively.



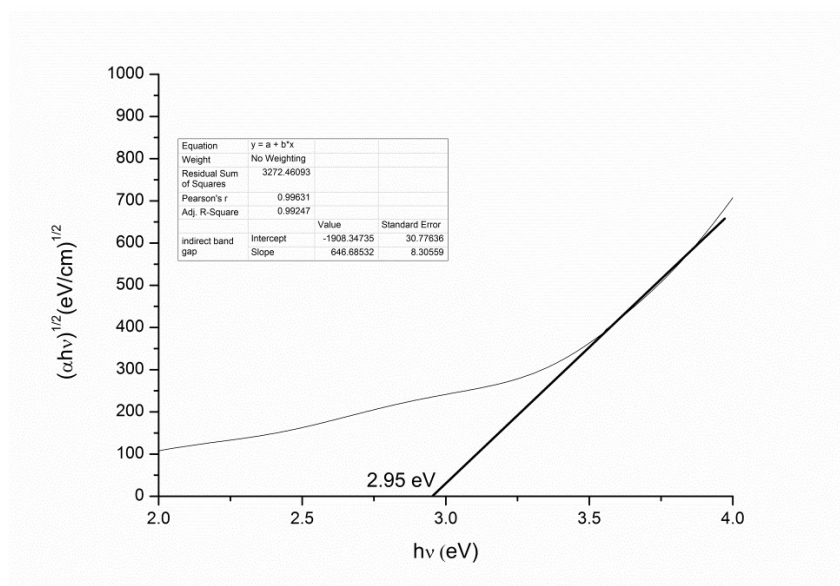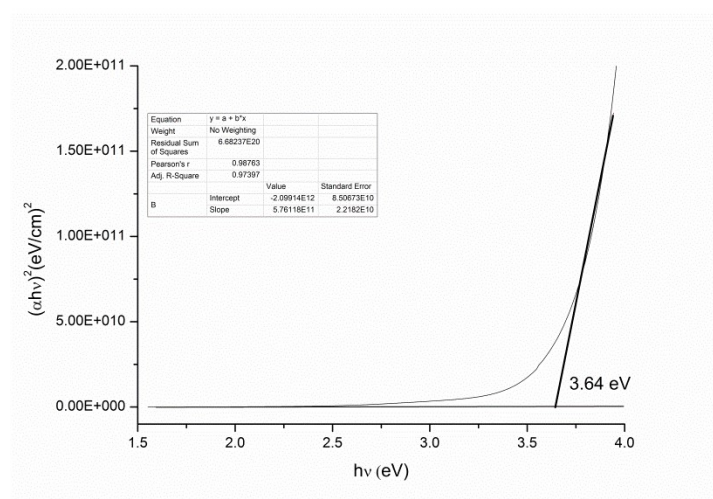

**Figure S15.** Raman measurement comparing different hotplate treatments affecting the substrate heating rate.

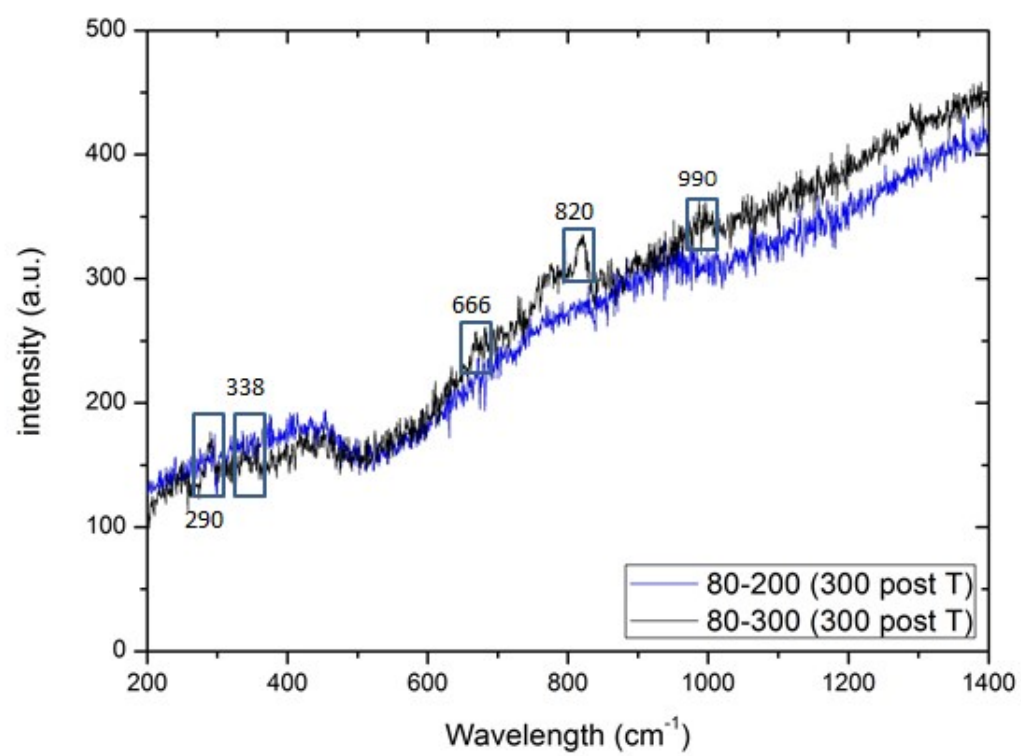

Supplement: c5ra18001e1.pdf [file c5ra18001e1.pdf]
